# Supplementary material
Source: PubMed Central journal article supplement (PMC2423249)

## SUPPLEMENTAL FIGURE LEGENDS

**Figure S1. TgIF2K-B gene encodes a eIF2 kinase homologue.** Schematic diagram depicting the TgIF2K-B genomic locus, is approximately 8.3 kb with two introns. Northern blot shows that the gene encodes an mRNA >9.0 kb containing an open reading frame of 7665 bp. The protein is predicted to be 2554 amino acid residues, with a large kinase domain (black) that is interrupted by two lengthy insertions (stippled boxes).

**Figure S2. Alignment of the kinase domain from the *T. gondii* and human eIF2 kinase family members.** Amino acid sequences from the kinase domain of the eIF2 kinases from *Homo sapiens* (Hs) [PKR, PEK, GCN2, and HRI] have been aligned with those in *T. gondii* (TgIF2K-A and -B). Letters in black boxes are residues identical in every kinase domain while shaded letters are residues that are chemically similar. Upper case letters in the consensus line represent identity and lower case letters denote conserved residues in at least 4 of the 6 species aligned. Kinase subdomains (I-XI) were represented using a black bar above the corresponding sequence. Dashes indicate gaps in the sequence that were removed to maximize the alignment. An insert of varying length is present in each eIF2 kinase domain between subdomains IV and V (represented by “///” in consensus line). A novel second insert is present in TgIF2K-A and -B between subdomains VII and VIII (represented by “\\” in consensus line). The number of amino acid residues comprised by the insert is represented at its respective location. The threonine (T) residue underscored in subdomain VIII contributes to kinase activation via autophosphorylation during stress.

**Figure S3. Predicted eIF2 kinase homologues in representative apicomplexan species.** Schematic diagram depicting the predicted eIF2 kinase (eIF2K) protein structures in apicomplexans. Three classes of eIF2 kinases are represented in apicomplexans, including those containing transmembrane domains (TM), the TgIF2K-B present only in *T. gondii*, and the GCN2-like eIF2 kinases. Tg = *T. gondii*; Pf = *Plasmodium falciparum*; Cp = *Cryptosporidium parvum*; Ta = *Theileria annulata*. Accession numbers are listed on the figure. Stippled boxes represent transmembrane domains. Black boxes denote the catalytic (kinase) domain.

Figure S1

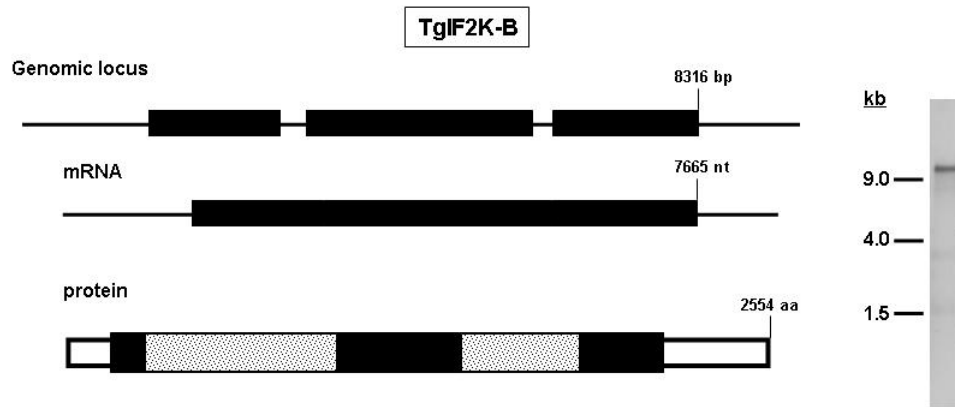

Figure S2

|           | I                                                                 | II                    | III                    |      |
|-----------|-------------------------------------------------------------------|-----------------------|------------------------|------|
|           | <i>P-loop</i>                                                     |                       |                        |      |
| TgIF2K-A  | FAIQKLVGQGGFGVVYQVRHLLLEPGHPIYAVKLLILLRLTLEDISL-RRDFREVAANRDL     |                       |                        | 4065 |
| TgIF2K-B  | FTSVVAVGRGGCGRVLKATHVLDG--QTYAIKEIKFAANREHLDAHMAVFLREVLCLRRL      |                       |                        | 327  |
| HsPKR     | FKEIELIGSGGFGQVFKAKHRIDG--KTYVIKRVKYN-----EKAEREVKALAKL           |                       |                        | 315  |
| HsPEK     | FEPIQCLGRGGFGVFEAKNKVDD--CNYAIKRIRLPNRELA----REKVMREVKALAKL       |                       |                        | 646  |
| HsGCN2    | FEELQLLGKGAFGAVIKVQNKLDG--CCYAVKRIPINP----ASRQFRRIKGEVTLLSRL      |                       |                        | 643  |
| HsHRI     | FEELAILGKGGYGRVYKVRNKLDG--QYYAIKKILIKG---ATKTVMCKVLREVKVLAGL      |                       |                        | 220  |
| Consensus | F l G GfG V k ldg                                                 | YaiKri                | rEV l L                |      |
|           | IV                                                                | V                     |                        |      |
|           |                                                                   | <i>hinge</i>          |                        |      |
| TgIF2K-A  | Y-SKHVVRYYTWWCE...616...LLIQMEMCNGVTLLREWLDRKDRSTVAMGFVPSSKNRWHSM |                       |                        | 4735 |
| TgIF2K-B  | DAHNPVRYFNSWVE...941...LYIQMEYCGMS-LDEYIAQTPEVDP-----ER           |                       |                        | 1309 |
| HsPKR     | D-HVNIVHYNGCWDG-...32...LFIQMEFCDKGTLEQWIEKRRGEK-----LDKVL        |                       |                        | 390  |
| HsPEK     | E-HPGIVRYFNAWLE...223...LYIQMQLCRKENLKDWMNGRCTIEE-----RERSV       |                       |                        | 913  |
| HsGCN2    | H-HENIVRYYNWIE...140...LYIQMEYCEKSTLRDTIDQGLYRDT-----VR           |                       |                        | 824  |
| HsHRI     | Q-HPNIVGYHTAWIE...144...LHIQMLCELS-LWDWIVERNKRGREYVDESACPYVMANV   |                       |                        | 417  |
| Consensus | H niVrY W e...///...L IQMe C L wi r                               |                       |                        |      |
|           | VIA                                                               | VIB                   | VII                    |      |
|           |                                                                   | <i>catalytic loop</i> |                        |      |
|           |                                                                   |                       | <i>activation loop</i> |      |
| TgIF2K-A  | ELELFKQLMKGIRDIHERGIVHRDLKPENIFVDPDTLVLKIIVDFGLAKFIQRENPSGAAA     |                       |                        | 4795 |
| TgIF2K-B  | NEEIVAMIIISGLYQCHSAGVMHRDLKPSNIFIDKETGVVKIGDFGLAFSEDMKQ-----      |                       |                        | 1363 |
| HsPKR     | ALELFEQITKGVDIHSSKLIHRDLKPSNIFLV-DTKQVKIGDFGLVTSLNKDG-----        |                       |                        | 443  |
| HsPEK     | CLHIFLQIAEAVEFLHSGKLMHRDLKPSNIFFT-MDDVVKVGDFGLVTAMDQDEEEQT--      |                       |                        | 970  |
| HsGCN2    | LWRLFREILDGLAYIHEKGMHRDLKPVNIFLD-SDDHVKIGDFGLATDHLAFSADSKQD       |                       |                        | 883  |
| HsHRI     | ATKIFQELVEGVFYIHNMGIVHRDLKPRNIFLHGPDQQVKIGDFGLACTDILQKNTDWTN      |                       |                        | 477  |
| Consensus | lf i gv yIH g                                                     | HRDLKP NIFl           | vKigDFGLa              |      |
|           | VIII                                                              | IX                    |                        |      |
| TgIF2K-A  | GGA---42---SYKGEVIGTPAYAAPE---GGGLCDEKADIYSSALILLELLCPRFTT        |                       |                        | 4887 |
| TgIF2K-B  | -----708-----TAGVGTRAYAPPEQL--QGGRYDFSVDI WALGLIVLDFTR-CNT        |                       |                        | 2108 |
| HsPKR     | -----KRTRSKGTLRYMSPEQI--SSQDYGKEVDLYALGLILAELLHV-CDT              |                       |                        | 488  |
| HsPEK     | ---VLTTPMPAYARHTGQVGTKLYMSPEQI--HGNSYSHKVDIFSLGLILFELLYP-FST      |                       |                        | 1023 |
| HsGCN2    | DQTGDLIKSDPSGHLTGMVGTALYVSPEVQGSTKSAYNQKVDLFSLGIIFFEMSYHPMT       |                       |                        | 943  |
| HsHRI     | RN-----GKRTPTHTRVGTCLYASPEQL--EGSEYDAKSDMYSLGVVLELFLQP-FGT        |                       |                        | 528  |
| Consensus | ...\\... T vGT Y sPEq g y kvD slglil el T                         |                       |                        |      |
|           | X                                                                 | XI                    |                        |      |
| TgIF2K-A  | VMERVKTLEDFKT---SYSVPQHIRLHLHPWYLLMKEMARPEPQHRPSAYT               |                       |                        | 4935 |
| TgIF2K-B  | AMEQATNFRNARDGRFPSTSTYP---WVVPFCRWCLQNDPSKRPTIRQ                  |                       |                        | 2155 |
| HsPKR     | AFETSKFFTDLRD---GIISDIFDKK---EKTLLQKLLS-KKPEDRPNTSE               |                       |                        | 531  |
| HsPEK     | QMERVRTLTIDVRN---LKFPPFLTQKYPCEYVMVQDMLS-PSPMERPEAIN              |                       |                        | 1070 |
| HsGCN2    | ASERIFVLNQLRDPTSPKFPEDFDDGEHAKQKSVISWLLNHDPKRPTATE                |                       |                        | 994  |
| HsHRI     | EMERAEVLTGLRT---GQLPESLRKRCVPQAKYIQHLTR-RNSSQRPSAIQ               |                       |                        | 575  |
| Consensus | mEr l r                                                           | p RP a                |                        |      |

Figure S3

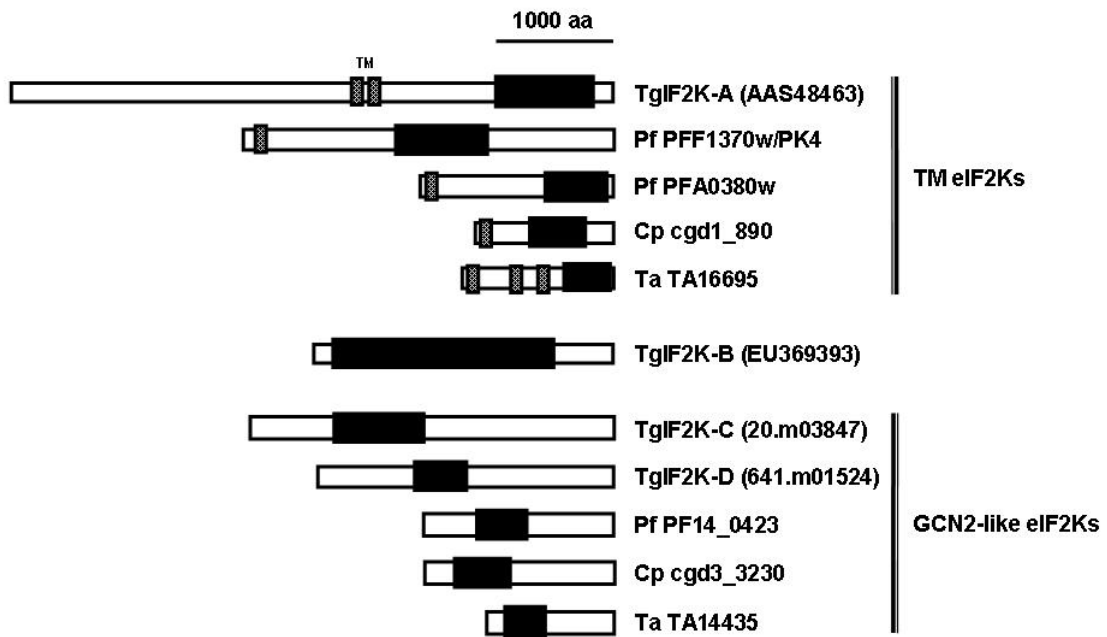

Supplement: supp_M800681200_Suppdata.pdf [file supp_M800681200_Suppdata.pdf]
